# Supplementary material for: BBX24 Increases Saline and Osmotic Tolerance through ABA Signaling in Arabidopsis Seeds
Source: MDPI journal article supplement (doi:10.3390/plants12132392), 2023-06-21
Supplement: s1 [file s1]

**Suppl. Table S1: Primers used for selection of mutant lines and qPCR**

**Primes for PCR**

| Gen          | Locus     | Salk line    | Primers                     |
|--------------|-----------|--------------|-----------------------------|
| <i>BBX24</i> | AT1G06040 | SALK_067473  | Rp_TGAAAGAAATCGTCAACAGCC    |
|              |           |              | Lp_GACGAGAGGAAGAAGGAGAGC    |
|              |           |              | LBa1_TGGTTCACGTAGTGGGCCATCG |
| <i>ABI5</i>  | AT2G36270 | SALK_013163C | Rp_CACTCGTTTTCTTCTTAAAGCG   |
|              |           |              | Lp_CAATGGAAGTTCGGAATCATG    |
|              |           |              | LBb1.3_ATTTTGCCGATTCGGAAC   |
| <i>HY5</i>   | AT5G11260 |              | For_TAAGAAAAATGCAGGAAC      |
|              |           |              | Rev-WT_CTCATCGCTTTC AATTCC  |
|              |           |              | Rev-215_CTCATCGCTTTC AATTCT |

**Primers for qPCR**

| Gene          | Locus     | Fw                      | Rv                         |
|---------------|-----------|-------------------------|----------------------------|
| <i>BBX24</i>  | AT1G06040 | AAGCCAGCAGCAACAACAACC   | GAGAAGTGAAAGAAATCGTCAACAGC |
| <i>ABI3</i>   | AT3G24650 | CCGCCAACCTCGCAGTATAATC  | CCTCCTCTGTCTCGCCATCC       |
| <i>ABI5</i>   | AT2G36270 | CAATCAACAACAAGCAGCAGCAG | CCACCACTAAAGACACCAACACC    |
| <i>UBC</i>    | AT5G25760 | CTGCGACTCAGGGAATCTTCTAA | TTGTGCCATTGAATTGAACCC      |
| <i>XERICO</i> | AT2G04240 | TGAGGTTTGAGAGCTTGTGCAGG | GAAAGCTGATGGTCTTCTGGCAC    |
| <i>PIF6</i>   | AT3G62090 | ACAACAGTTTCTGCCTGCAC    | GCATTGGCATTAGTCCAGGATG     |
